# Supplementary figures and images for: Synthesis and characterization of bismuth(III) complex with an EDTA-based phenylene ligand and its potential as anti-virulence agent
Source: PeerJ journal article supplement (doi:10.7717/peerj-ichem.4), 2022-07-26

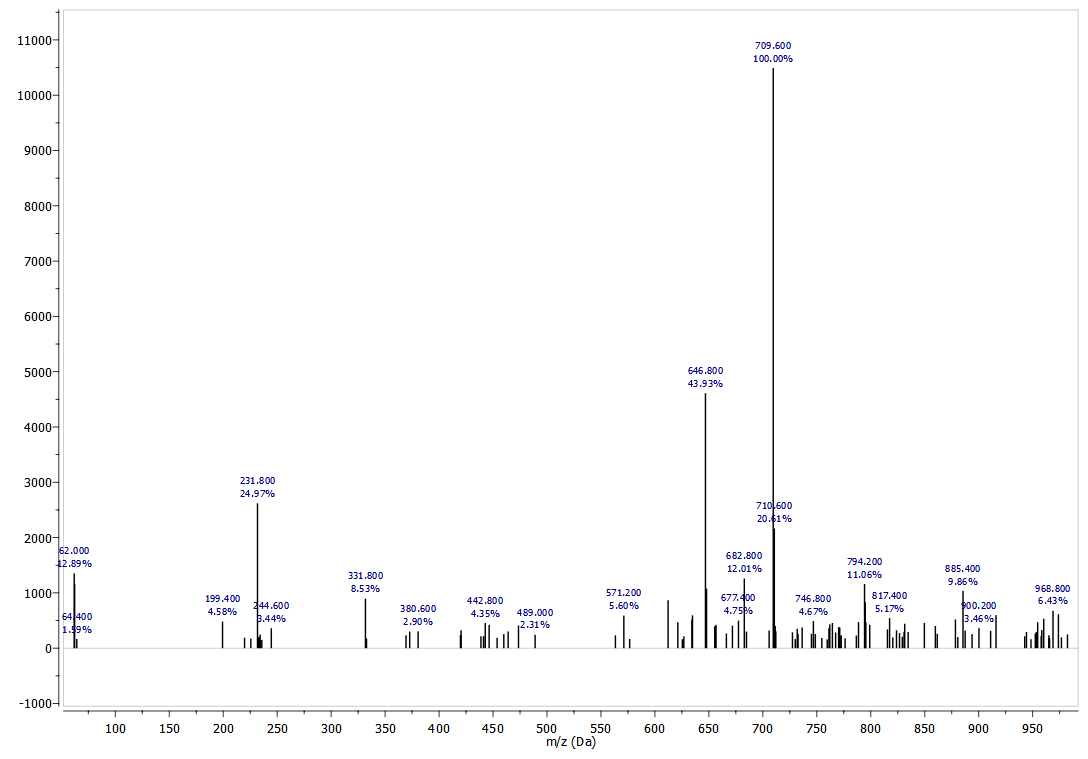


Figure S1. Mass spectrum of Bi-edtabz

Supplement: Fig_S1._bibz_spectrum.docx [file Fig_S1._bibz_spectrum.docx]

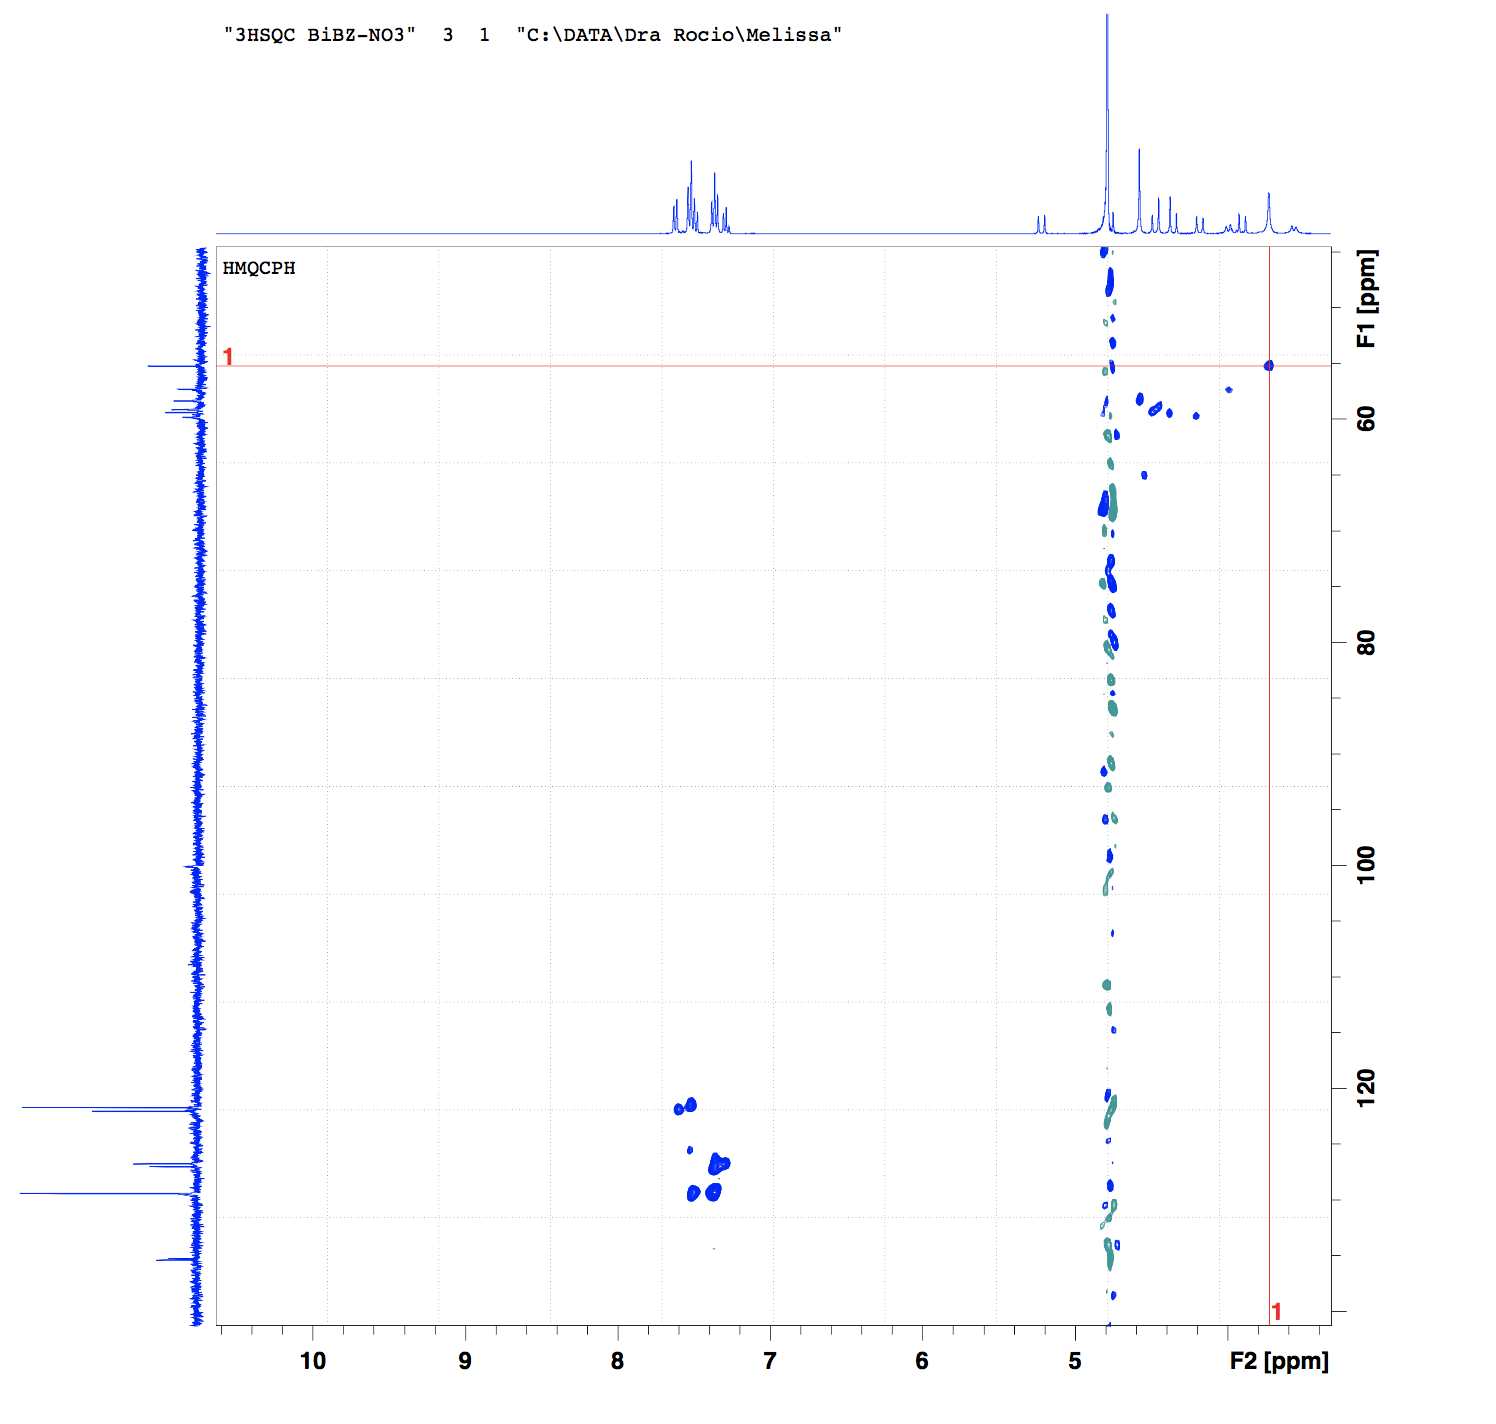
 Figure S2. HSQC experiment of Bi-edtabz in D2O.

Supplement: Fig_S2_68130_JT_staff.docx [file Fig_S2_68130_JT_staff.docx]
